# Supplementary material
Source: publisher figshare collection journal article supplement (https://frontiersin.figshare.com/ndownloader/files/24064670)
Supplement: Supplementary file [file 24064670]

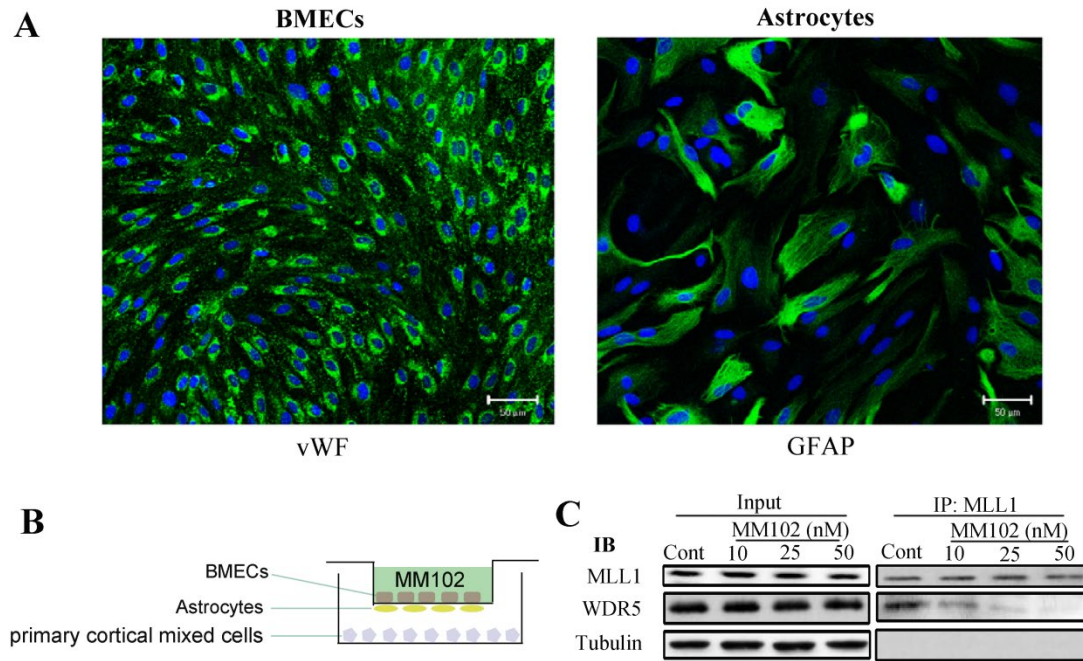

**Supplementary Figure 1.** A. The identification of the purity of primary BMECs and astrocytes. B. Schematic of the *in vitro* brain-blood barrier model. C. Representative images of immunoprecipitation and western blot showed that MM102 could cross the barrier consisting of BMECs and astrocytes to inhibit the interaction between MLL1 and WDR5.
